# Supplementary material for: A novel human induced pluripotent stem cell blood-brain barrier model: Applicability to study antibody-triggered receptor-mediated transcytosis
Source: PubMed Central journal article supplement (PMC5789839; doi:10.1038/s41598-018-19522-8), 2018-01-30

**A novel human induced pluripotent stem cell blood-brain barrier model: Applicability to study antibody-triggered receptor-mediated transcytosis**

Maria Ribocco-Lutkiewicz, Caroline Sodja, Julie Haukenfrers, Arsalan S Haqqani, Dao Ly, Peter Zachar, Ewa Baumann, Marguerite Ball, Jez Huang, Marina Rukhlova, Marzia Martina, Qing Liu, Danica Stanimirovic, Anna Jezierski\*, Mahmud Bani-Yaghoub

Human Health Therapeutics Portfolio, National Research Council of Canada, Ottawa, ON, K1A 0R6, Canada

\*Corresponding author:

Dr. Anna Jezierski

National Research Council Canada,

1200 Montreal Rd., Bldg. M-54,

Ottawa, ON, K1A 0R6, Canada

Tel: 613-990-1999

Email: [anna.jezierski@nrc.ca](mailto:anna.jezierski@nrc.ca)

## **Supplementary Methods**

### **DNA isolation and methylation assay**

DNA was isolated from  $1.0 \times 10^6$  AF cells and iPSC cells using the Quick gDNA Miniprep (Zymo Research), according to the manufacturer's protocol. The EZ DNA Methylation gold Kit (Zymo Research) was used to modify unmethylated cytosine residues to thymidine. Briefly, the conversion of approximately 300 ng of genomic DNA was carried out in a thermal cycler at 98°C for 10 min, 64°C for 2.5 hr and then stored at 4°C for up to 20 hr. The reaction was then followed by a clean-up, desulfonation and the bisulfite-modified DNA was eluted and immediately used for PCR amplification. Briefly, 2 µl of bisulfite converted DNA was added to a solution containing 1X MSB PCR buffer (16.6 mM ammonium sulfate, 67 mM Tris, pH 8.8, 6.7 mM MgCl<sub>2</sub>, 10 mM 2-mercaptoethanol), 2.5 µl of DMSO, dNTPs (1.25 mM each), primers (1 µM each) and 2.5 U Platinum Taq DNA Polymerase High Fidelity in a final volume of 50 µl (Life Technologies). The primers were specific for bisulfite-converted DNA only (Supplementary Table 2). The PCR reactions were carried out in a Biorad DNA Engine Dyad thermal cycler using the following protocol: 1 cycle of denaturation at 95 °C for 3 min, 35 cycles of amplification at 95 °C for 1 min, 55–58 °C for 1 min, 72 °C for 1 min and 1 cycle of extension at 72 °C for 10 min. PCR products were loaded onto a 2% agarose gel and the amplicon band was excised and purified using the GeneClean Spin Kit (MP Biomedicals), as per the manufacturer's instructions. Zero Blunt TOPO PCR Cloning Kit (Life Technologies) was used for cloning the PCR product obtained and clones were PCR screened with M13 primers (Supplementary Table 2) for positive transformants. At least 10 positive clones were cultured overnight in 2 ml of LB medium containing 50 µg/ml Kanamycin (Sigma) in a 37°C shaking incubator at 200 rpm. The next day, plasmid DNA was isolated using the Genelute Plasmid

Mini-Prep Kit (Sigma) and sent for sequencing on an ABI 377 sequencer. The sequence was analyzed using Sequencher version 5.2.3 software (Genecode). The sequence of the primers used for Bisulfite (BS) PCR are from<sup>69</sup> (Supplementary Table 2) and M13F and M13R are included in the Zero Blunt TOPO PCR Cloning Kit.

### **Microarray printing, cDNA synthesis and hybridization**

A BBB specific oligonucleotide set of 434 oligos (Eurofins) was printed, in house, onto Nexterion E epoxysilane coated slides (Applied Microarrays) with a Nano-plotter NP2.1(GeSiM) at 50% humidity and a temperature of 8°C. The slides were transferred to a 42°C oven and incubated at 80% humidity overnight then stored in a desiccator (Bel-Art) until ready for use. cDNA was prepared according to the 3DNA array detection 900 kit recommendations (Genisphere), using 1µg of total RNA from each sample and Superscript II Reverse Transcriptase (Life Technologies). The slides were washed and blocked according to the manufacturer's recommendations, spun dry at 200 x g for 5 min and placed in a SlideBooster Microarray Hybridisation Station SB401 (Beckman Coulter). The cDNA hybridization mix was pipetted on top of the slides and then covered with Lifter Slips (Thermo Scientific) and the hybridization reaction was carried out at 42 °C overnight. The slides were then washed in 2X SSC, 0.2% SDS; 2X SSC and 0.2XSSC each for 15 min at room temperature on a shaker then spun dry. The 3DNA capture reagents were prepared, as per manufacturer's protocol, then pipetted onto the slides in the SlideBooster Hybridization Station, as previously described and incubated at 42 °C for 4 hr. The slides were then washed as described above and scanned immediately with the GenePix scanner 4200A (Molecular Devices), as per the manufacturer's

protocol and the data was analyzed using the GenePix Pro 6.1 software (Molecular Devices). Individual gene intensity values for the genes assessed are listed in Supplementary Table 4.

### **Permeability coefficient (Pe) calculations**

Permeability coefficient (Pe) is a parameter that is determined in an *in vitro* or *ex vivo* transport assay system that represents the permeability of a compound across the cell monolayer only. For this calculation, the barrier effect of the cell membrane/insert alone (empty inserts) is subtracted from the overall barrier effect of the cells plus membrane (inserts with cells). Permeability coefficients are calculated from each insert separately and from the pooled data of three inserts in each experiment. Clearance volumes ( $\mu\text{l}$ ) are calculated as previously described<sup>49</sup>:

$$\text{clearance } (\mu\text{l}) = ([C]A \times V_A) / [C]D, \text{ where}$$

[C]A is the input compound concentration in the accepting chamber (corrected for the sampling aliquots removed in previous time points),  $V_A$  is the volume in the accepting chamber and [C]D is the initial concentration of input compound in the donor chamber. The slopes of the clearance curves (clearance vs time) for empty membrane and membrane with cell monolayers, representing permeability x surface area product (PS;  $\mu\text{l}/\text{min}$ ), are calculated using linear regression analysis. The PS value for endothelial monolayer (PSe) is calculated from:

$$1/PSe = 1/PS_{c+m} - 1/PS_m, \text{ where}$$

$PS_{c+m}$  is the slope of the clearance curve for cell monolayer and membrane together, and  $PS_m$  is the slope of the clearance curve of membrane alone (ie. no cells). The permeability coefficient (Pe;  $\text{cm}/\text{min}$ ) for the endothelial cell monolayer is calculated by dividing PSe by surface area of the membrane ( $0.9 \text{ cm}^2$  for our inserts).

## Supplementary Tables

**Table 1. Antibodies/Reagents for immunofluorescence staining**

| Antibody/Reagent | Supplier                    | Source               | Dilution | Secondary Antibody                            |
|------------------|-----------------------------|----------------------|----------|-----------------------------------------------|
| OCT4             | Santa Cruz<br>sc-5279       | Mouse<br>Monoclonal  | 1:100    | Rhodamine conjugated rabbit<br>anti-mouse IgG |
| SOX2             | In house                    | Rabbit<br>Polyclonal | 1:5000   | Rhodamine conjugated goat<br>anti rabbit IgG  |
| NANOG            | R&D Systems<br>AF1997       | Goat<br>Polyclonal   | 1:100    | ALEXA568 conjugated<br>rabbit anti goat IgG   |
| TRA-1-81         | Stemgent<br>09-0069         | Mouse<br>Monoclonal  | 1:100    | Directly conjugated to<br>DyLight 488         |
| KLF4             | Abcam<br>Ab151733           | Rabbit<br>Monoclonal | 1:500    | Rhodamine conjugated goat<br>anti rabbit IgG  |
| SSEA3            | R&D Systems<br>MC-631       | Rat<br>Polyclonal    | 1:20     | ALEXA488 goat conjugated<br>anti rat IgG      |
| SSEA4            | R&D Systems<br>MC-813-70    | Mouse<br>Monoclonal  | 1:20     | Rhodamine conjugated rabbit<br>anti mouse IgG |
| CD30             | BD<br>Biosciences<br>562876 | Mouse<br>monoclonal  | 1:20     | Antibody directly conjugated<br>to BV421      |
| Nestin           | Millipore<br>ABD69          | Rabbit<br>Polyclonal | 1:200    | Rhodamine conjugated goat<br>anti rabbit IgG  |
| MAP2             | Sigma<br>M1406              | Mouse<br>Monoclonal  | 1:100    | Rhodamine conjugated rabbit<br>anti mouse IgG |
| NCAM             | Millipore<br>Ab 5032        | Rabbit<br>Polyclonal | 1:100    | ALEXA488 conjugated goat<br>anti rabbit IgG   |
| BIII-Tubulin     | Millipore<br>MAB1637        | Mouse<br>Monoclonal  | 1:200    | Rhodamine conjugated rabbit<br>anti mouse IgG |
| VGLUT1           | Millipore<br>MAB5502        | Mouse<br>Monoclonal  | 1:100    | Rhodamine conjugated rabbit<br>anti mouse IgG |
| VGLUT2           | Millipore<br>MAB5504        | Mouse<br>Monoclonal  | 1:100    | Rhodamine conjugated rabbit<br>anti mouse IgG |
| GFAP             | DAKO<br>Z0334               | Rabbit<br>Polyclonal | 1:500    | ALEXA488 conjugated goat<br>anti rabbit IgG   |
| NeuN             | Abcam<br>Ab104225           | Rabbit<br>Polyclonal | 1:500    | Rhodamine conjugated goat<br>anti rabbit IgG  |
| Synaptophysin    | Sigma<br>SVP-38             | Mouse<br>Monoclonal  | 1:200    | Rhodamine conjugated rabbit<br>anti mouse IgG |
| Synaptotagmin    | Stressgen<br>SYA-130        | Mouse<br>Monoclonal  | 1:100    | Rhodamine conjugated rabbit<br>anti mouse IgG |
| SOX17            | R&D Systems<br>AF1924       | Goat<br>Polyclonal   | 1:100    | ALEXA568 conjugated<br>rabbit anti goat IgG   |
| PAX6             | Covance                     | Rabbit               | 1:50     | Rhodamine conjugated goat                     |

|                                         |                         |                      |                                    |                                                    |
|-----------------------------------------|-------------------------|----------------------|------------------------------------|----------------------------------------------------|
|                                         | PRB-278P                | Polyclonal           |                                    | anti rabbit IgG                                    |
| ZO-1                                    | Abcam<br>Ab59720        | Rabbit<br>Polyclonal | 1:100                              | Rhodamine conjugated goat<br>anti rabbit IgG       |
| Claudin-5                               | Abcam<br>Ab53765        | Rabbit<br>Polyclonal | 1:100                              | Rhodamine conjugated goat<br>anti rabbit IgG       |
| VWF                                     | DAKO<br>A0082           | Rabbit<br>Polyclonal | 1:200                              | Rhodamine conjugated goat<br>anti rabbit IgG       |
| CD31                                    | Abcam<br>Ab28364        | Rabbit<br>Polyclonal | 1:20                               | Rhodamine conjugated goat<br>anti rabbit IgG       |
| Occludin                                | Abcam<br>Ab31721        | Rabbit<br>Polyclonal | 1:100                              | Rhodamine conjugated goat<br>anti rabbit IgG       |
| GLUT1 (immune)                          | Abcam<br>Ab40084        | Mouse<br>Monoclonal  | 1:100                              | Rhodamine conjugated rabbit<br>anti mouse IgG      |
| GLUT1<br>(Flow)                         | R&D Systems<br>FAB1418N | Human                | 5 $\mu$ l/10 <sup>6</sup><br>cells | Human Glut1 Alexa Fluor<br>700-conjugated Antibody |
| TfR                                     | Abcam<br>Ab84036        | Rabbit<br>Polyclonal | 1:100                              | Rhodamine conjugated goat<br>anti rabbit IgG       |
| IGF1R                                   | Cell Signaling<br>3027S | Rabbit<br>Polyclonal | 1:100                              | Rhodamine conjugated goat<br>anti rabbit IgG       |
| LRP1                                    | Abcam<br>Ab92544        | Rabbit<br>Polyclonal | 1:100                              | Rhodamine conjugated goat<br>anti rabbit IgG       |
| ULEX                                    | Vector Labs<br>FL-1061  |                      | 1:500                              | Directly conjugated to FITC                        |
| Wheat Germ<br>Agglutinin                | Vector Labs<br>FL-1021  |                      | 1:2000                             | Directly conjugated to FITC                        |
| DAKO Protein<br>Block Serum Free        | Agilent<br>X0909        |                      |                                    |                                                    |
| DAKO Antibody<br>Diluent                | Agilent<br>S0809        |                      |                                    |                                                    |
| DAKO<br>Fluorescence<br>Mounting Medium | Agilent<br>S30238       |                      |                                    |                                                    |

**Table 2. Primers used for RT-PCR**

| Gene                                    | Forward Sequence      | Reverse Sequence     |
|-----------------------------------------|-----------------------|----------------------|
| <b>Primers for BBB Characterization</b> |                       |                      |
| GAPDH                                   | GAGAAGGCTGGGGCTCATTTG | GGTGCTAAGCAGTTGGTGGT |

|         |                         |                         |
|---------|-------------------------|-------------------------|
| SLC2A1  | ACGCTCTGATCCCTCTCAGT    | GCAGTACACACCGATGATGAAG  |
| ABCB1   | TGAATCTGGAGGAAGACATGAC  | CCAGGCACCAAATGAAACC     |
| LEF1    | CAGATGTCAACTCCAAACAAGG  | GATGGGATATACAGGCTGACC   |
| STRA6   | TTTGGAAATCGTGCTCTCCG    | AAGGTGAGTAAGCAGGACAAG   |
| FZD4    | TACCTCACAAAACCCCATCC    | GGCTGTATAAGCCAGCATCAT   |
| FZD6    | TCGTCAGTACCATATCCCATG   | CCCATTCTGTGCATGTCTTTT   |
| FZD7    | GATGATAACGGCGATGTGA     | AACAAAGCAGCCACCGCAGAC   |
| FST     | G TTCATGGAGGACCGCAGTG   | TCTTCTTG TTCATTTCGGCATT |
| APCDD1  | GGAGTCACAGTGCCATCACAT   | CCTGACCTTACTTCACAGCCT   |
| PECAM1  | GCAAAATGGGAAGAACCTGA    | CACTCCTTCCACCAACACCT    |
| CDH5    | CGCAATAGACAAGGACATAACAC | GGTCAAACCTGCCCATACTTG   |
| VWF     | CCCGAAAGGCCAGGTGTA      | AGCAAGCTTCCGGGGACT      |
| LDLR    | GCCATTGTCGTCTTTATGTC    | AAACACATACCCATCAACGA    |
| SLC7A5  | TTAAAGTAGATCACCTCCTCGA  | GGATGAGATTTCGTACCAGAG   |
| SLC16A1 | GGTGTTTCTTAGTAGTTATGGG  | TCTTATTGGCTTTGTGTTGG    |
| SLC15A2 | TTTTTGTGCTTCAGCCGGAC    | GAAGTGTGCCACAACAAGCA    |
| INSR    | TG TTCATCCTCTGATTCTCTG  | GCTTAGATGTTCCCAAAGTC    |
| LEPR    | GGAAATCACACGAAATTCAC    | GCACGATATTTACTTTGCTC    |
| BCAM    | GCTTTCCTTACCTCTAAACAG   | GAAGGTGATAGAACTGAGCG    |
| SLC38A5 | TGTCAGTGTTCAACCTCAG     | GTGGATGGAGTAGGACGA      |
| SLC28A1 | ACCTCGTTGATTGCAGCCTC    | GTGGTTGTAAAACCGACAGCAG  |
| SLC29A3 | ATTGATTCCCACACACCCCC    | GAGCCCAGTGTTAAGCCCAA    |
| SLC1A1  | GTTATTCTAGGTATTGTGCTGG  | CTGATGAGATCTAACATGGC    |
| ABCG2   | TCAGGTCTGTTGGTCAATCTC   | GTTTCCTGTTGCATTGAGTCC   |

|                  |                            |                         |
|------------------|----------------------------|-------------------------|
| ABCC1            | AATAGAAGTGTTGGGCTGAG       | CGAGACACCTTAAAGAACAG    |
| ABCC2            | TGCTTCCTGGGGATAATCAG       | CACGGATAACTGGCAAACCT    |
| ABCC4            | AATCTACAACCTCGGAGTCCA      | CAAGCCTCTGAATGTAAATCC   |
| ABCC5            | TCACTACATTAAGACTCTGTCC     | GGATACTTTCTTTAGGACGAGAG |
| ABCC3            | GCAGCACCTGGGAAAAATGC       | TGTCAGGGTAGAGTCCAATGAG  |
| AGER             | GTAGATTCTGCCTCTGAACTC      | CTTCACAGATACTCCCTTCTC   |
| SLC21A14         | TGGTTGTCAAACCTCCAACA       | AGCTGTGGCTTAATGCACCT    |
| PLVAP            | CAATGCAGAGATCAATTCAAGG     | ACGCTTTCCTTATCCTTAGTG   |
| TFRC             | GCACAGCTCTCCTATTGAAAC      | GGTATCCCTCTAGCCATTCAG   |
| LRP1             | GACTACATTGAATTTGCCAGCC     | TCTTGTGGGCTCGGTTAATG    |
| WNT7A            | CGGGAGATCAAGCAGAATG        | CGTGGCACTTACATTCCAG     |
| WNT7B            | GCTTCGTCAAGTGCAACA         | GGAGTGGATGTGCAAAATG     |
| IGF1R            | ACAGAGAACCCCAAGACTGAGG     | TGATGTTGTAGGTGTCTGCGGC  |
| Tmem30a<br>iso1  | GGGCACCGCGAAGA             | ATTCAAAGAGTATCGGCCAGCT  |
| Tmem30a<br>iso 2 | AGATCGAGGGCAACGTGTTTAT     | ATTCAAAGAGTATCGGCCAGCT  |
| CLDN3            | CCCACGCGAGAAGAAGTACA       | CAAGTATTGGCGGTCACCCA    |
| CLDN5            | ATGGGGTCCGCAGCGTTGGAGATCCT | GACGTAGTTCTTCTTGTCGT    |
| ZO-1             | AGCTCCACAGGCTTCAGGAAC      | CTGTGAGTCCTTCAGCTGTGG   |
| ZO-2             | CCGGAGGCAGAGACAACCC        | AACTTCTGCCATCAAACCTCG   |
| ZO-3             | CTCTACGCACAAGCCCAGAA       | CCCCAGTCATAGCCGTCTTC    |
| Occludin         | AGTACATGGCTGCTGCTGATG      | AATTGGAGTGTTTCAGCCCAGT  |

\* All primers are from<sup>26</sup>, with the exception of GAPDH, PECAM1, ABCC2, SLC21A14, and Tmem30A isoform1 and isoform 2 which were designed in-house.



**Primers for exogenous episomal gene expression** (primers from<sup>27</sup>)

|           |                      |                      |
|-----------|----------------------|----------------------|
| exoNanog: | CAGAAGGCCTCAGCACCTAC | AGGAACTGCTTCCTTCACGA |
| exo-c-MYC | TCAAGAGGCGAACACACAAC | AGGAACTGCTTCCTTCACGA |

**Table 3.** Peptide signatures used for SRM detection of various proteins used in the study.

| Protein  | Peptide Sequence                | Charge | m/z of peptide | Peptide fragment signatures (m/z) used for quantification | LOQ (pM)<br>(c) |
|----------|---------------------------------|--------|----------------|-----------------------------------------------------------|-----------------|
| IGF1R5   | TIDNYAMASRq                     | 2      | 664.27         | 1113.52, 721.41, 448.29, 519.33                           | 1               |
|          | LEESGGGLVQAGSLR                 | 2      | 765.35         | 688.42, 787.42, 560.25, 489.33                            | 1               |
| OX26     | CPAPNLLGGPSVFIFPPK              | 2      | 956.01         | 1145.46, 1582.65, 1258.53, 341.17                         | 5               |
|          | TTAPSVYPLAPVCGDITGSSVTLGCLVK    | 2      | 1425.87        | 1850.67, 1290.06, 1147.95, 1921.67                        | 5               |
| FC5      | ITWGGDNTFYNSVSK                 | 2      | 844.92         | 534.48, 729.47, 737.89, 1288.44                           | 25              |
|          | ITWGGDNTFYNSVSK <sup>(b)</sup>  | 2      | 848.92         | 542.48, 733.48, 741.87, 1296.44                           | 25              |
| A20.1    | TFSDPMAWFR                      | 2      | 694.77         | 582.22, 807.4, 922.42, 1140.5                             | 33              |
|          | TTYADSVK                        | 2      | 524.23         | 203.1, 682.34, 845.4                                      | 66              |
|          | EFVAAGSSTGR                     | 2      | 541.29         | 500.12, 564.32, 635.28, 706.44                            | 50              |
| Human Fc | TTPVLDSDGSFFLYSK                | 2      | 937.28         | 836.8, 1150.24, 1265.44, 1378.72, 1477.44                 | 8               |
|          | TTPVLDSDGSFFLYSK <sup>(b)</sup> | 2      | 941.28         | 840.5, 1158.25, 1273.44, 1386.74, 1485.44                 | 8               |

|         |                |   |        |                                     |   |
|---------|----------------|---|--------|-------------------------------------|---|
| Albumin | DNCFATEGPNLVAR | 2 | 782.32 | 246.16, 346.28, 1174.48             | - |
|         | APQVSTPTLVEAAR | 2 | 720.84 | 703.0, 856.9, 957.9, 1044.8, 1143.7 | - |

(a) Limits of quantitation (LOQ) is shown in picomoles per litres (pM). LOQ of each peptide was determined from a dilution series (50-2000 attomole) of each protein digest or ILIS peptide analyzed by nanoLC-SRM.  
(b) Heavy peptide (isotopically labeled internal standards ILIS)

**Table 4. Individual gene intensity values from microarray analysis comparing i-BEC and HBMECs**

| Gene Name       | i-BEC | HBMEC |
|-----------------|-------|-------|
| A2M             | 8349  | 8656  |
| ABCA1 (ABC1)    | 9530  | 9663  |
| ABCA10          | 14903 | 13215 |
| ABCA12 (1)      | 10454 | 5029  |
| ABCA12 (2)      | 2662  | 2135  |
| ABCA13          | 44131 | 86095 |
| ABCA2           | 52539 | 38978 |
| ABCA3           | 57226 | 49163 |
| ABCA4           | 34184 | 34028 |
| ABCA5           | 50489 | 45207 |
| ABCA6           | 2462  | 2509  |
| ABCA7           | 54644 | 56807 |
| ABCA8           | 40660 | 23961 |
| ABCA9           | 55967 | 44472 |
| ABCB1/MDR-1 PGP | 7314  | 9312  |
| ABCB10          | 13570 | 22027 |
| ABCB11          | 44080 | 33638 |
| ABCB4           | 13294 | 12940 |
| ABCB5           | 2712  | 1914  |
| ABCB6           | 9084  | 5963  |
| ABCB8           | 52513 | 47226 |
| ABCB9 (1)       | 24700 | 24818 |
| ABCB9 (2)       | 52146 | 51836 |
| ABCC1           | 40756 | 33288 |
| ABCC10          | 6688  | 7384  |
| ABCC11          | 28954 | 29489 |
| ABCC12          | 18325 | 18852 |
| ABCC13 (1)      | 4158  | 3497  |

|                 |       |       |
|-----------------|-------|-------|
| ABCC13 (2)      | 5568  | 7748  |
| ABCC2           | 4261  | 2648  |
| ABCC3           | 4731  | 3248  |
| ABCC5           | 994   | 1005  |
| ABCC8           | 7183  | 7075  |
| ABCC9           | 26845 | 23902 |
| ABCD3           | 12023 | 10860 |
| ABCD4 (ALD)     | 1461  | 776   |
| ABCF1           | 10090 | 11284 |
| ABCF2           | 41607 | 34890 |
| ABCF3           | 15356 | 15438 |
| ABCF3 (GCN20)   | 16163 | 16842 |
| ABCG1           | 21956 | 24272 |
| ABCG2           | 2202  | 2449  |
| ABCG4           | 6949  | 7420  |
| ABCG5           | 50517 | 45793 |
| ABCG8           | 32639 | 31283 |
| ACCN4           | 23556 | 27439 |
| ACTB            | 49279 | 46585 |
| AGER            | 28799 | 28670 |
| AKAP12 (gravin) | 16582 | 15402 |
| ALPI            | 49943 | 42325 |
| ALPL            | 24631 | 23510 |
| ALPP            | 42073 | 45317 |
| ANGPT1 (V1)     | 16698 | 19538 |
| ANGPT1 (V2)     | 1740  | 1268  |
| ANO4 (TMEM16D)  | 8477  | 9396  |
| ANO6 (TMEM16F)  | 19618 | 20717 |
| ANO9 (TMEM16J)  | 48132 | 36781 |
| AP2A2           | 18375 | 22423 |
| APOB            | 46766 | 40121 |
| APOE            | 65535 | 66134 |
| APOL1           | 14228 | 11133 |
| AQP10           | 26825 | 26790 |
| AQP2            | 19643 | 19711 |
| ARL6IP5         | 23101 | 22370 |
| ATF1            | 51461 | 51131 |
| ATP11C          | 1090  | 911   |
| ATP13A4         | 4143  | 3394  |

|                  |       |       |
|------------------|-------|-------|
| ATP1A1           | 6028  | 4531  |
| ATP1A2           | 5278  | 3967  |
| ATP1A3           | 42796 | 29637 |
| ATP1B1           | 14969 | 8599  |
| ATP1B3           | 8253  | 8375  |
| ATP2A2           | 59474 | 52154 |
| ATP2B1           | 3574  | 1674  |
| ATP2B3           | 47767 | 66859 |
| ATP6V0D1         | 19891 | 34314 |
| ATP6V1B1         | 16443 | 14581 |
| ATP7A            | 3365  | 5535  |
| ATP8B1           | 54593 | 51961 |
| ATP8B2           | 4510  | 4618  |
| ATP8B4           | 10587 | 10919 |
| BCAP31           | 51496 | 46937 |
| BEST4 (VMD2L2)   | 45071 | 33023 |
| BPIFA2           | 56472 | 50962 |
| BSG              | 22267 | 16289 |
| CACNA1A          | 18013 | 15915 |
| CACNA1C          | 2665  | 3049  |
| CACNA2D1         | 21178 | 21970 |
| CACNB2           | 1273  | 708   |
| CAV1             | 8700  | 53398 |
| CD36             | 58421 | 60717 |
| CDH12            | 3621  | 4230  |
| CDH5             | 7484  | 21230 |
| CFL1             | 32593 | 33115 |
| CFTR             | 52492 | 50457 |
| CFTR/MRP (ABCC6) | 27878 | 28768 |
| CGN              | 9942  | 7061  |
| CHRNA5           | 7059  | 7806  |
| CKB              | 51319 | 49145 |
| CLCA1            | 41831 | 39704 |
| CLCN1            | 50484 | 23737 |
| CLCN3            | 33588 | 41005 |
| CLDN1            | 13616 | 12101 |
| CLDN3            | 54495 | 40107 |
| CLDN5            | 41333 | 40447 |
| CLIC1            | 44041 | 46469 |

|                      |       |       |
|----------------------|-------|-------|
| CNGB1                | 43582 | 36100 |
| CNTNAP2              | 2722  | 1720  |
| CNTNAP4              | 10591 | 11438 |
| CNTNAP5              | 15830 | 17394 |
| COL4A1               | 4341  | 9328  |
| COL4A2               | 31035 | 32635 |
| COL4A4               | 19788 | 19627 |
| COLEC12 (SRCL)       | 7787  | 7986  |
| CPE                  | 33824 | 27516 |
| CPNE3                | 2368  | 1627  |
| CPNE7                | 57657 | 52056 |
| CST3                 | 15258 | 17664 |
| CTNNB1               | 31476 | 28060 |
| CTNND1               | 18076 | 17082 |
| CTTN                 | 15694 | 17734 |
| CUBN                 | 51782 | 39821 |
| CYB5-M               | 37041 | 39018 |
| DENND5A<br>(RAB6IP1) | 19044 | 32863 |
| DENND5B              | 4138  | 2777  |
| EEA1                 | 1872  | 1255  |
| EFEMP1               | 45728 | 37001 |
| ENG                  | 49003 | 40614 |
| ENT3 (SLC29A3)       | 20162 | 20370 |
| ENT4 (SLC29A4)       | 48729 | 40586 |
| EPAS1                | 12995 | 7965  |
| ESAM                 | 3831  | 68266 |
| F11R                 | 61507 | 59450 |
| F5                   | 30604 | 28991 |
| FGF19                | 2672  | 4340  |
| FGG                  | 64513 | 51312 |
| FLT1                 | 18181 | 21447 |
| FN1                  | 9579  | 5636  |
| GABRA2               | 7817  | 9399  |
| GAPDH                | 57481 | 61768 |
| GFAP                 | 11962 | 12914 |
| GGA1                 | 34656 | 27739 |
| GGTL4                | 56549 | 63807 |
| GPRC6A G             | 6685  | 6887  |
| GRIK3                | 16187 | 16821 |

|                       |       |       |
|-----------------------|-------|-------|
| GRIN1                 | 43967 | 41953 |
| GRIN2A                | 13336 | 12641 |
| HBA1                  | 58004 | 51394 |
| HHIPL2                | 17754 | 17650 |
| HIF1A                 | 6802  | 5858  |
| HIST2H2AA4            | 59803 | 73709 |
| HPRT1                 | 12133 | 12829 |
| ICAM-1(CD54)          | 1664  | 482   |
| IGF1R                 | 44654 | 34599 |
| IGF2 (somatomedin A), | 38459 | 35899 |
| IGF2R                 | 25984 | 28341 |
| IGFBP1                | 21890 | 20941 |
| IGFBP2                | 57082 | 51311 |
| IGFBP3                | 14705 | 4479  |
| IGFBP4                | 58998 | 58550 |
| IGFBP5                | 9629  | 738   |
| IGFBP6                | 60427 | 57553 |
| IKBKE                 | 24299 | 23652 |
| IL1B                  | 39886 | 34257 |
| INSR                  | 3478  | 3694  |
| ITPR2                 | 16101 | 17537 |
| ITPR3                 | 24649 | 26033 |
| JAM-B                 | 51438 | 43400 |
| JAM-C                 | 4517  | 13210 |
| JUP (CTNNG)           | 45237 | 68362 |
| KCNA5                 | 27812 | 23553 |
| KCNA7                 | 10141 | 9202  |
| KCNH1                 | 10196 | 8794  |
| KCNH5                 | 2993  | 2791  |
| KCNK10                | 2837  | 2849  |
| KCNMB2                | 3060  | 3677  |
| KCNQ2                 | 5827  | 5048  |
| KCTD16                | 2972  | 2597  |
| KDR                   | 660   | 1050  |
| LAMA1                 | 17644 | 19409 |
| LAMA3                 | 7551  | 5962  |
| LAMA4                 | 35607 | 38046 |
| LAMB1                 | 7886  | 19147 |
| LAMB2                 | 45942 | 35848 |

|                |       |       |
|----------------|-------|-------|
| LAT1-3TM       | 8301  | 7482  |
| LCN1           | 49168 | 45325 |
| LRP1           | 54000 | 51824 |
| LRP10          | 16495 | 18040 |
| LRP11          | 1893  | 2205  |
| LRP2           | 11975 | 11255 |
| LRP3           | 55596 | 46933 |
| LRP4           | 34971 | 31935 |
| LRP5           | 34251 | 31032 |
| LRP6           | 11448 | 14097 |
| LRP-8          | 5398  | 5691  |
| LU             | 38674 | 37475 |
| M6PR           | 33551 | 28995 |
| MACF1          | 3126  | 4547  |
| MAGT1          | 48911 | 48472 |
| MAOB           | 30511 | 23760 |
| MAP1A          | 37177 | 32776 |
| MAP1B          | 36409 | 33021 |
| MARCO          | 40996 | 29262 |
| MB             | 5571  | 4998  |
| MBP            | 30470 | 29686 |
| MCOLN1         | 60720 | 60256 |
| MCP            | 6928  | 7630  |
| MCT1 (SLC16A1) | 52128 | 52274 |
| MCT2 (SLC16A7) | 7934  | 14385 |
| MCT3 (SLC16A8) | 7400  | 7687  |
| MF12           | 6879  | 6608  |
| MFSD2A         | 14148 | 14344 |
| MLLT4, AF6     | 3845  | 5337  |
| MMP12          | 762   | 687   |
| MMP13          | 6656  | 6555  |
| MMP14          | 28698 | 27698 |
| MMP2           | 35153 | 31792 |
| MMP3           | 20850 | 24951 |
| MMP7           | 26680 | 38585 |
| MMP8           | 1900  | 1950  |
| MMP9           | 13650 | 4211  |
| MPZL1          | 28855 | 27072 |
| MPZL2 (EVA1)   | 8270  | 9390  |

|                      |       |       |
|----------------------|-------|-------|
| MRP4 (ABCC4)         | 4189  | 3650  |
| MSR1                 | 3814  | 2957  |
| MVP                  | 65535 | 58033 |
| MYO5A                | 6013  | 8092  |
| NFKB1                | 4995  | 4774  |
| NFKBIA               | 50062 | 47958 |
| NRP1                 | 6114  | 8408  |
| NRP2                 | 3428  | 2046  |
| NRXN1                | 4471  | 3260  |
| NRXN2                | 24929 | 23882 |
| OATP-H (SLC21A12)    | 11462 | 8200  |
| OATPRP3<br>(SLCO3A1) | 13791 | 10884 |
| OCN                  | 19013 | 15837 |
| OSTalpha             | 2856  | 2567  |
| OSTbeta              | 27556 | 29373 |
| P2RX4                | 48990 | 40718 |
| PARD3                | 21437 | 23793 |
| PECAM-1 (CD31)       | 30137 | 28999 |
| PKD1                 | 61314 | 59302 |
| PLAT                 | 50499 | 47558 |
| PLP2                 | 17625 | 17159 |
| PLSCR1               | 1705  | 919   |
| PLSCR3               | 14784 | 8354  |
| PLSCR4               | 2449  | 7571  |
| PODXL                | 9563  | 5931  |
| PRAF2                | 24458 | 23804 |
| PRG1                 | 3815  | 31126 |
| PROCR                | 43200 | 45606 |
| PROM1                | 3584  | 2487  |
| PROM2                | 5964  | 4671  |
| RAB3D                | 10313 | 10518 |
| RAB5A                | 6680  | 6635  |
| RAMP2                | 64448 | 52821 |
| REEP2                | 61314 | 65506 |
| REEP5                | 51117 | 47451 |
| REEP6                | 54075 | 55812 |
| RPH3A                | 46697 | 42643 |
| RYR2                 | 18118 | 19906 |
| S100A6               | 56696 | 43557 |



|                |       |       |
|----------------|-------|-------|
| S100B          | 22150 | 21931 |
| SCARA3         | 9230  | 8643  |
| SCARB1         | 13033 | 11962 |
| SCARB2         | 14309 | 14091 |
| SCN10A         | 10708 | 7356  |
| SCN3A          | 633   | 201   |
| SCN4B          | 11438 | 11522 |
| SCN7A          | 2380  | 1470  |
| SCN8A          | 21492 | 20502 |
| SEC61A1        | 19366 | 21265 |
| SEC61A2        | 15697 | 16226 |
| SELE           | 21217 | 22202 |
| SHROOM3        | 14267 | 15902 |
| SLC10A6 (SOAT) | 28720 | 26407 |
| SLC11A2        | 23056 | 26645 |
| SLC12A2        | 38273 | 27758 |
| SLC12A7        | 15069 | 19119 |
| SLC15A1        | 25513 | 25614 |
| SLC15A2        | 27674 | 26079 |
| SLC16A1        | 20897 | 23112 |
| SLC16A10       | 33524 | 31495 |
| SLC16A11       | 63866 | 69500 |
| SLC16A2        | 21092 | 19142 |
| SLC16A3        | 63464 | 71174 |
| SLC16A4        | 58575 | 53079 |
| SLC16A5        | 15305 | 14516 |
| SLC16A6        | 13211 | 12132 |
| SLC17A1        | 5974  | 7271  |
| SLC17A2        | 21237 | 28460 |
| SLC17A3        | 31366 | 21281 |
| SLC17A4        | 21952 | 22289 |
| SLC17A6        | 2943  | 2779  |
| SLC17A7        | 53135 | 42474 |
| SLC17A8        | 12601 | 11584 |
| SLC18A1        | 28266 | 27663 |
| SLC18A2        | 3800  | 2954  |
| SLC1A1         | 3417  | 4234  |
| SLC1A2         | 8122  | 8299  |
| SLC1A3         | 1470  | 807   |

|                   |          |          |
|-------------------|----------|----------|
| SLC1A4            | 5421     | 6155     |
| SLC1A5, ASCT2     | 52242    | 40316    |
| SLC1A6            | 10867    | 9444     |
| SLC1A7            | 28679    | 31107    |
| SLC21A14          | 5398     | 6092     |
| SLC21A8           | 12667    | 13155    |
| SLC22A1 (hOCT1)   | 8147     | 8200     |
| SLC22A10          | 46954    | 34361    |
| SLC22A11          | 45720    | 37489    |
| SLC22A12          | 65535    | 57502    |
| SLC22A13          | 38639    | 42435    |
| SLC22A14          | 31100    | 28043    |
| SLC22A15          | 13394    | 14138    |
| SLC22A17          | 41874    | 35278    |
| SLC22A18          | 28634    | 15599    |
| SLC22A1LS         | 33999    | 29889    |
| SLC22A2           | 14470    | 5658     |
| SLC22A3           | 50791    | 46681    |
| SLC22A4           | 46170    | 42030    |
| SLC22A5           | 12986    | 13746    |
| SLC22A7           | 60221    | 60313    |
| SLC22A8, hOAT3    | 3826     | 4173     |
| SLC22A9           | 38908    | 33149    |
| SLC26A5 (Prestin) | 36201    | 28836    |
| SLC26A8           | 6234     | 5026     |
| SLC28A1 (CNT1)    | 32726.61 | 25783.06 |
| SLC28A3           | 17326    | 23214    |
| SLC29A1           | 53889    | 48259    |
| SLC29A2           | 32836    | 32522    |
| SLC2A1            | 15563    | 9324     |
| SLC2A10           | 22602    | 27322    |
| SLC2A11           | 40742    | 39209    |
| SLC2A12           | 9990     | 17202    |
| SLC2A13           | 21428    | 28551    |
| SLC2A14           | 9295     | 1641     |
| SLC2A4            | 38926    | 33246    |
| SLC2A5            | 17034    | 16397    |
| SLC2A6            | 27650    | 27769    |
| SLC2A8            | 14762    | 14033    |

|                  |       |       |
|------------------|-------|-------|
| SLC2A9           | 50596 | 46914 |
| SLC30A1          | 36416 | 29977 |
| SLC30A8          | 38001 | 31557 |
| SLC35B2          | 47730 | 44539 |
| SLC35B4          | 19859 | 14863 |
| SLC37A4          | 11594 | 11580 |
| SLC38A1          | 11893 | 6531  |
| SLC38A2 (ATA2)   | 3580  | 1956  |
| SLC38A4          | 3086  | 2561  |
| SLC3A2           | 56368 | 55228 |
| SLC41A2          | 14841 | 15061 |
| SLC44A3          | 1825  | 1232  |
| SLC5A10          | 47124 | 44198 |
| SLC5A7           | 1756  | 783   |
| SLC6A13          | 34552 | 33501 |
| SLC6A6           | 14331 | 15699 |
| SLC7A1           | 2015  | 1163  |
| SLC7A2           | 31471 | 30497 |
| SLC7A3           | 33521 | 27056 |
| SLC7A4           | 64650 | 57200 |
| SLC7A5           | 37829 | 29465 |
| SLC7A6           | 4052  | 4766  |
| SLC7A7           | 60169 | 44632 |
| SLC7A8           | 26810 | 28287 |
| SLC7A9           | 12353 | 13283 |
| SLC9A5           | 59421 | 44703 |
| SLC9B1           | 19190 | 17865 |
| SLCO1A2          | 25135 | 27278 |
| SLCO1B1          | 42509 | 38146 |
| SLCO2A1          | 1759  | 713   |
| SLCO2B1          | 33733 | 29640 |
| SLCO3A1          | 17881 | 16671 |
| SLCO4A1          | 4940  | 5426  |
| SLCO5A1          | 49669 | 35674 |
| SLCO6A1 (OATP-I) | 8141  | 7993  |
| SMARCA4          | 48114 | 42079 |
| SORCS1           | 4104  | 4132  |
| SORCS3           | 9438  | 9766  |
| SORL1            | 7224  | 5918  |

|                     |       |       |
|---------------------|-------|-------|
| SOX17               | 8710  | 10257 |
| SPARC (osteonectin) | 15130 | 35268 |
| STAB1               | 49811 | 37477 |
| SUSD1               | 4220  | 4759  |
| SVOPL               | 14766 | 15535 |
| SXR (NR1I2)         | 27231 | 24001 |
| SYPL1               | 12561 | 14156 |
| TAP1                | 55286 | 53246 |
| TAP2                | 7244  | 9679  |
| TAPBP               | 13112 | 13264 |
| TFR2                | 4724  | 4871  |
| TFRC                | 5689  | 4533  |
| THBS2               | 4530  | 3659  |
| TIMP1               | 56238 | 56648 |
| TIMP2               | 8798  | 11343 |
| TIMP3               | 9057  | 6130  |
| TIMP4               | 37797 | 42086 |
| TJP1                | 16579 | 18904 |
| TJP2                | 9399  | 9055  |
| TJP3                | 45813 | 38917 |
| TMEM30A (CDC50)     | 10619 | 12022 |
| TNF-a               | 4285  | 4681  |
| TOM1L1              | 8194  | 7508  |
| TRPC3               | 12845 | 19686 |
| TRPC4               | 14691 | 16219 |
| TRPM2               | 13091 | 11956 |
| TRPM3               | 47014 | 46409 |
| TRPM7               | 35931 | 32061 |
| TRPV5               | 45470 | 44971 |
| TUBA3               | 29036 | 16571 |
| VCAM1               | 42580 | 29929 |
| VEGF-A              | 6908  | 6131  |
| VIM                 | 17214 | 24242 |
| VLDLR               | 7339  | 6759  |
| VWF                 | 42099 | 29804 |
| WNK1                | 12775 | 11552 |
| YBX3 (CSDA)         | 16955 | 22804 |
| ZER1                | 53725 | 32627 |

Microarray experiments were performed on triplicate cell samples, where HBMEC was used as a control during data analysis. For the i-BEC cells, 3 biological replicates were used in the analysis from 3 independent differentiation cultures. Dye-swap was done during hybridization, which resulted in 6 direct comparisons between samples. Signal intensity of each genes was normalized against the average intensity of 10 housekeeping genes that were included on the microarray slides (GUSB, HMBS, PES1, PGK1, POP4, PPIA, PPIB, RPL30, RPL37A and RPLP2). Plot (Figure 4A) illustrates individual gene intensity values (listed in this table) of HBMEC versus i-BEC for all genes assessed on the microarray. Genes showed significant differences between i-BEC and HBMEC are listed in Figure 4B.

**Table 5. Reagents for iPSC differentiation protocols**

| <b>AFC/iPSC Reagents</b>                                                                                                                                                                                                                                                                                                                                                                                                                                                                                                                                                                                                                                                                                                                                                                                                                                                                                                        |
|---------------------------------------------------------------------------------------------------------------------------------------------------------------------------------------------------------------------------------------------------------------------------------------------------------------------------------------------------------------------------------------------------------------------------------------------------------------------------------------------------------------------------------------------------------------------------------------------------------------------------------------------------------------------------------------------------------------------------------------------------------------------------------------------------------------------------------------------------------------------------------------------------------------------------------|
| <ul style="list-style-type: none"> <li>• DMEM Cat # 11965-092 (Life Technologies)</li> <li>• FBS Cat # 080150 lot# 115651 (Wisent)</li> <li>• DMEM/F12 Cat #10565-018 (Life Technologies)</li> <li>• Corning Matrigel hESC Quality Cat # 354277 (Corning)</li> <li>• Y27632 ROCK Inhibitor Cat # 72302 (Stem Cell Technologies)</li> <li>• mTeSR1 Cat # 05850 (Stem Cell Technologies)</li> <li>• ReLeSR Cat # 05872 (Stem Cell Technologies)</li> <li>• DMSO Cat # D8418 (Sigma)</li> <li>• StainAlive Dylight 488 Mouse anti-human TRA1-81 Antibody Cat # 09-0069 (Stemgent)</li> </ul>                                                                                                                                                                                                                                                                                                                                       |
| <b>Neural Differentiation</b>                                                                                                                                                                                                                                                                                                                                                                                                                                                                                                                                                                                                                                                                                                                                                                                                                                                                                                   |
| <ul style="list-style-type: none"> <li>• STEMdiff Neural Induction Medium Cat# 05835 (Stem Cell Technologies)</li> <li>• STEMdiff Neural Progenitor medium Cat# 05833 (Stem Cell Technologies)</li> <li>• Accutase Cat # 7920 (Stem Cell Technologies)</li> <li>• Knock-out DMEM/F12 Cat #12660012 (Gibco)</li> <li>• Accutase Cat # 7920 (Stem Cell Technologies)</li> <li>• NPMM (Neural Progenitor Maintenance BulletKit Medium-Cat. CC3209 Lonza)</li> <li>• B27 supplement (50X) Cat # 17504-044 (Life Technologies)</li> <li>• N2 supplement (100X) Cat # 17502-048 (Life Technologies)</li> <li>• Poly-L-ornithine Cat # P4957 (Sigma)</li> <li>• Laminin Cat# 23017-015 (Gibco)</li> <li>• Poly-L-lysine Cat# P4704 (Sigma)</li> <li>• CTNF Cat # C-3835 (Sigma-Aldrich)</li> <li>• Human recombinant EGF Cat # PHG-0311 (Life Technologies)</li> <li>• Corning Matrigel hESC Quality Cat # 354277 (Corning)</li> </ul> |

### i-BEC Differentiation

- mTeSR1 Cat # 05850 (Stem Cell Technologies)
- Accutase Cat # 7920 (Stem Cell Technologies)
- Knockout DMEM/F12 Cat # 12660-012 (Life Technologies)
- Knockout serum replacement Cat #10828-028 (Life Technologies)
- 100X MEM Non-Essential Amino Acids Solution Cat # 11140-050 (Life Technologies)
- Glutamax (100X) Cat # 35050-061 (Life Technologies)
- 2-Mercaptoethanol, 1000x solution Cat# 21985-023 (Life Technologies)
- Human Endothelial-SFM Cat # 11111-044 (Life Technologies)
- Platelet-Poor Plasma Derived Serum Cat # BT-214 (Alfa-Aesar)
- All-trans Retinoic Acid Cat # R2625 (Sigma)

### Transwell Plating

- Gelatin from porcine skin Cat# G1890 (Sigma)
- 12 well companion plate Cat # 353503 (Falcon)
- 12 well cell culture insert, PET, 1  $\mu$ m pore size Cat. # 353103 (BD-Falcon)
- Rat-tail Collagen Type 1 Cat # 354236 (VWR)
- Collagen IV Cat # C5533 (Sigma)
- Fibronectin Cat # F1056-1MG (Sigma)

## Supplementary Figures

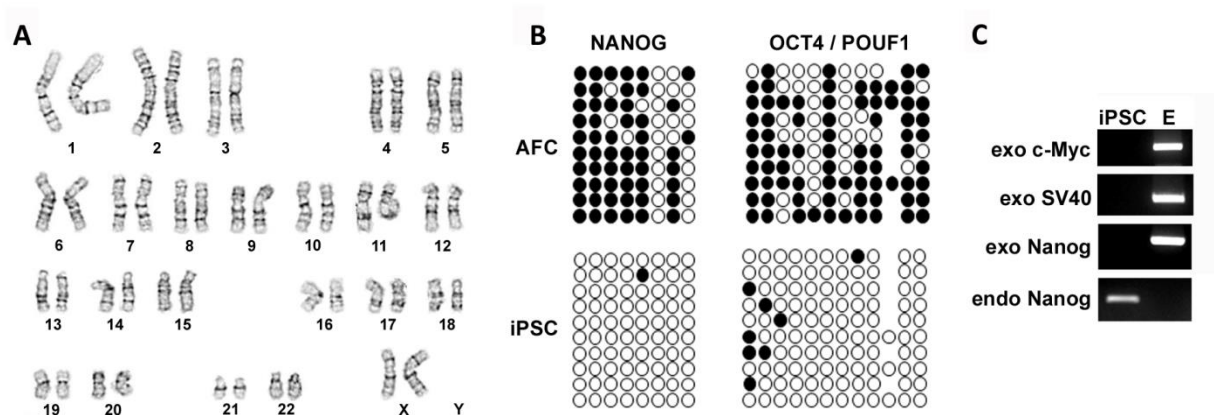

**Supplementary Figure 1. Karyotypic stability and hypomethylation of NANOG and OCT4 promoters in AF-iPSCs.**

(A). Representative karyotype analysis of AF-iPSCs based on 20 G-banding metaphase cells demonstrating normal chromosomes. (B) Analysis of the methylation status of the *OCT4* and *NANOG* promoters in AFC and iPSC using bisulfite sequencing. Open circles indicate unmethylated and closed circles indicate methylated CpG dinucleotides. (C) PCR analysis for episomal DNA in AF-iPSCs based on the expression of exogenous (exo) *c-Myc*, *SV40* and *NANOG* and endogenous (endo) *NANOG* expression to confirm exogenous episomal gene silencing. Cropped gels shown; Episomal DNA template (E) was used as positive control.

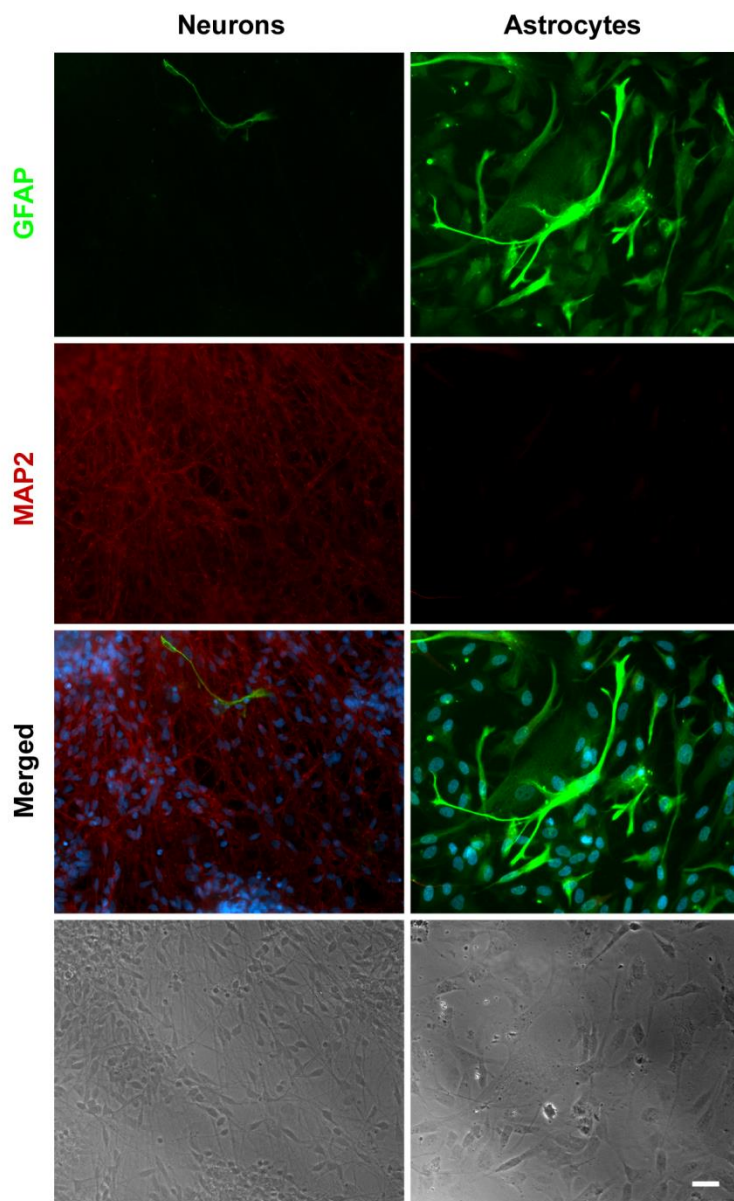

**Supplementary Figure 2. Purity of AF-iPSC-derived neurons and astrocytes**

Representative immunofluorescence confirming purity of iPSC-derived terminally differentiated neurons (MAP2) and astrocytes (GFAP). Note a single GFAP positive contaminating astrocyte



in neuronal cultures. No MAP2<sup>+</sup>/GFAP<sup>+</sup> cells were observed confirming efficiency in differentiation. Nuclei counterstained with Hoescht. Scale bar, 20 μm.

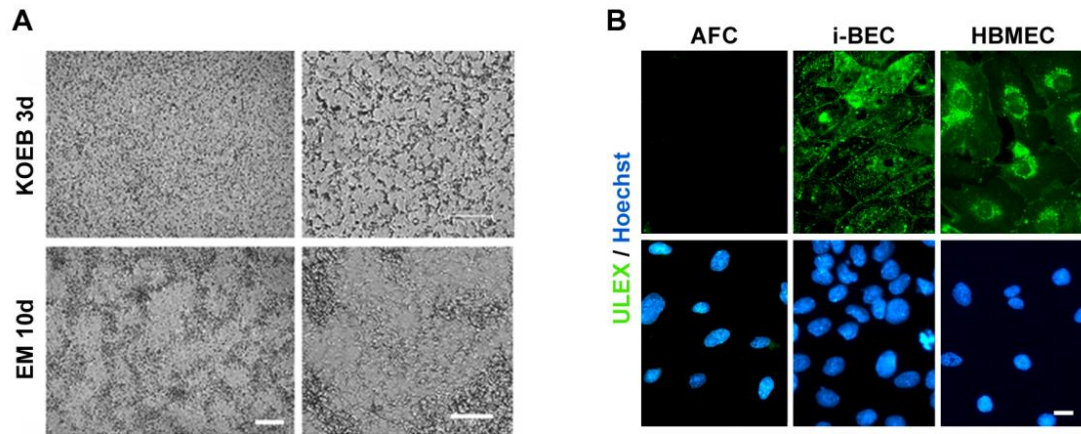

### Supplementary Figure 3. Morphological changes of AF- iPSC cultures in KOEB and EM medium

(A) Representative phase contrast images showing morphological changes following the transition of AF-iPSC from mTesR1 medium to low-osmolality KnockOut DMEM/F12 medium (KOEB) and EM. Note homogeneity in 3 day (3D) KOEB culture at low magnification (left panel) and endothelial-like cobblestone morphology at higher magnification (right panel). Characteristic endothelial cobblestone morphology becomes more prominent following maturation for 10 days in EM. Scale bar, 100 μm (left panel) and 60 μm (right panel). (B) i-BECs are positive for ULEX staining, a lectin that selectively binds to the L-fucose residues in endothelial cells. HBMEC and AFCs were used as a positive and negative control, respectively. i-BECs ULEX staining was performed at 10 days in EM. Nuclei counterstained with Hoechst. Scale bar, 20 μm.

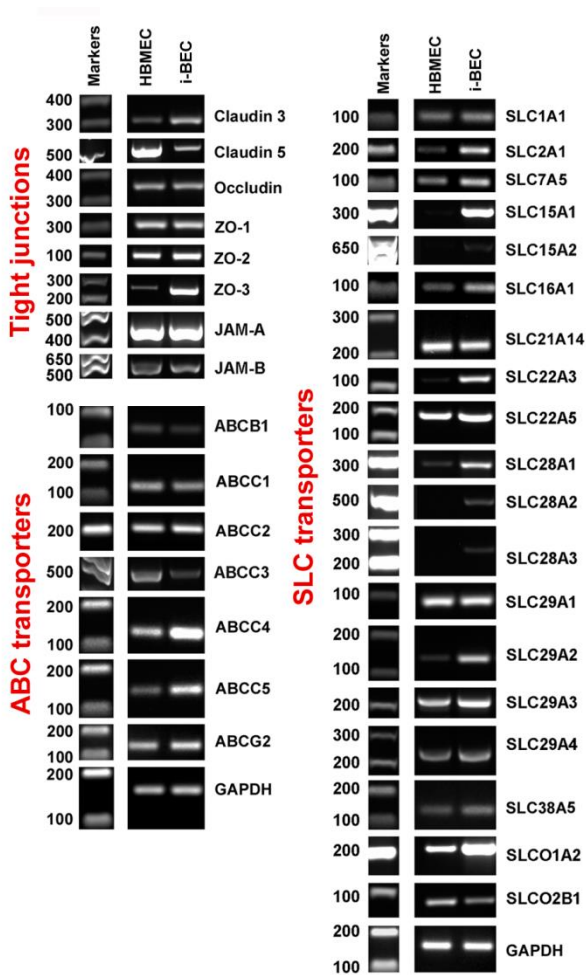

**Supplementary Figure 4. RT-PCT transcript expression in i-BEC and HBMECs**

Transcript expression characteristic of brain endothelial cells, such as tight junctions, ABC and SLC transporters examined by RT-PCR. Cropped gels shown; *GAPDH* and HBMEC were used as an internal and positive control, respectively. Primers listed in Supplementary Table 2.

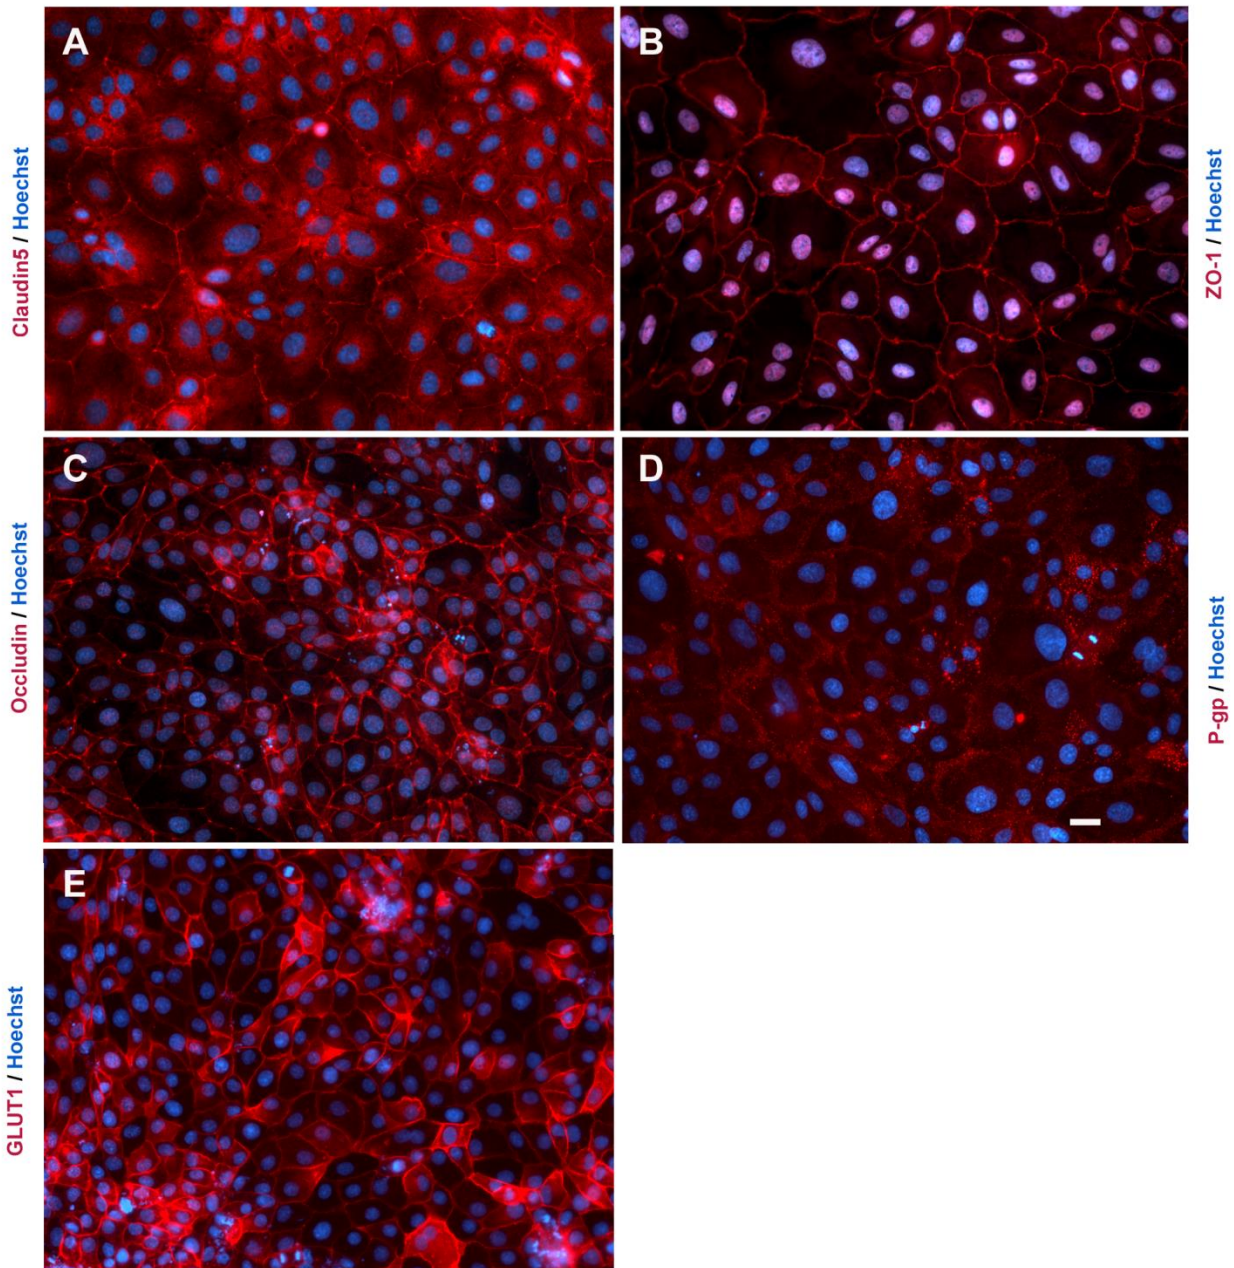

**Supplementary Figure 5. Immunofluorescence images showing expression of requisite BBB markers**

Low magnification immunofluorescence images depicting expression of requisite BBB markers Claudin-5, Occludin, GLUT1, ZO-1 and P-gp. Nuclei counterstained with Hoechst. Scale bar, 20  $\mu\text{m}$ .

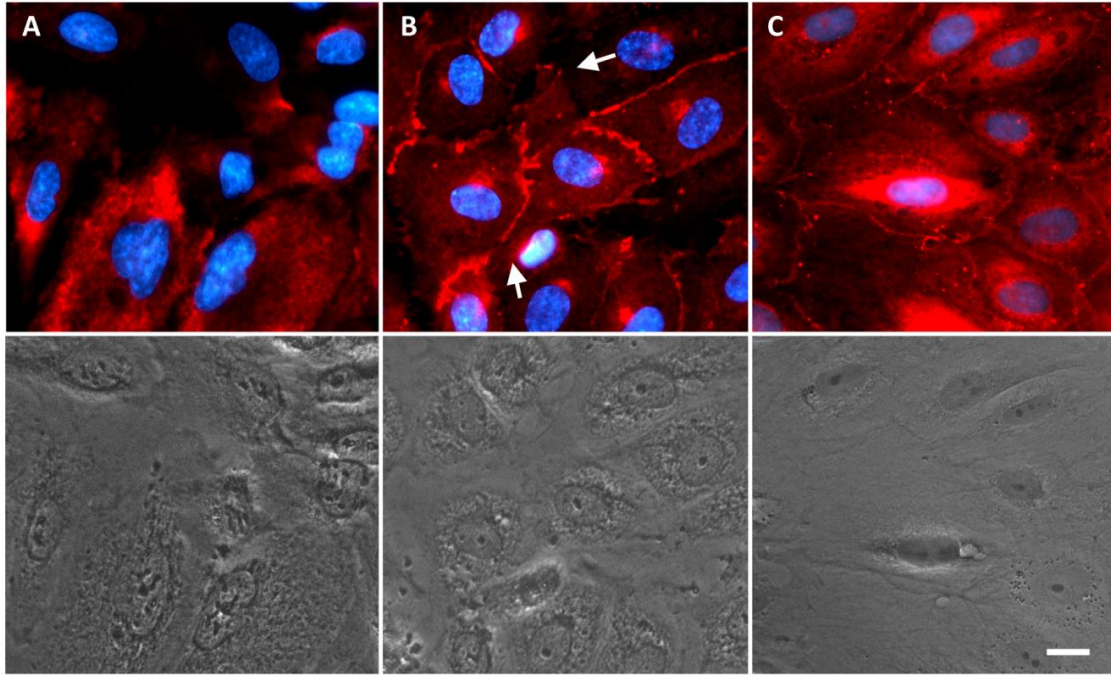

**Supplementary Figure 6. Immunostaining depicting localization of Claudin-5 tight junctions in AFC, HBMEC and i-BECs.**

Immunostaining of Claudin-5 showing diffuse, cytoplasmic localization in AFC (A) and discontinuous intercellular tight junctions in HBMEC cultures (B, arrow) compared to the continuous intercellular contacts in i-BECs (C). Nuclei counterstained with Hoechst. Scale bar, 20  $\mu\text{m}$ .

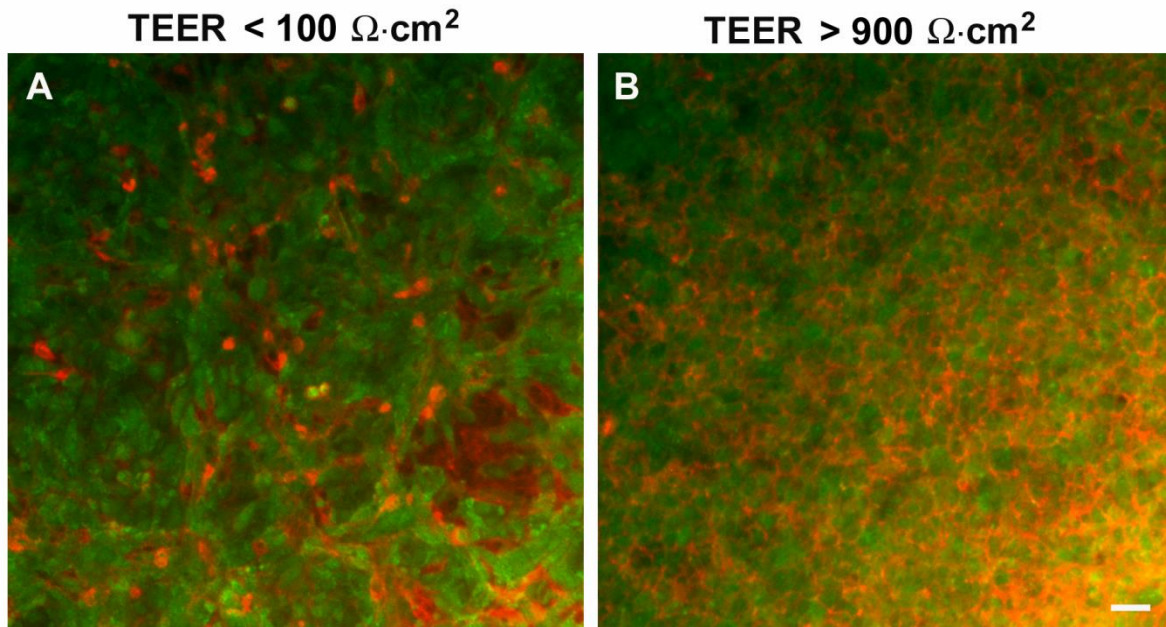

**Supplementary Figure 7. CFDA/CMO staining depicting monolayer integrity**

Representative lower magnification CFDA (green) and CMO (red) staining of i-BEC monolayers with accompanying TEER values. **(A)** Note visible intercellular spaces (devoid of CFDA staining) between adjacent i-BEC cells and lack of CMO positive cobblestone morphology on cultures that yield low TEER ( $\leq 100 \Omega \text{cm}^2$ ). **(B)** Tight packing of i-BEC cells with continuous membrane contacts and no visible intercellular gaps reflected in high TEER ( $\geq 100 \Omega \text{cm}^2$ ). Scale bar, 40  $\mu\text{m}$ .

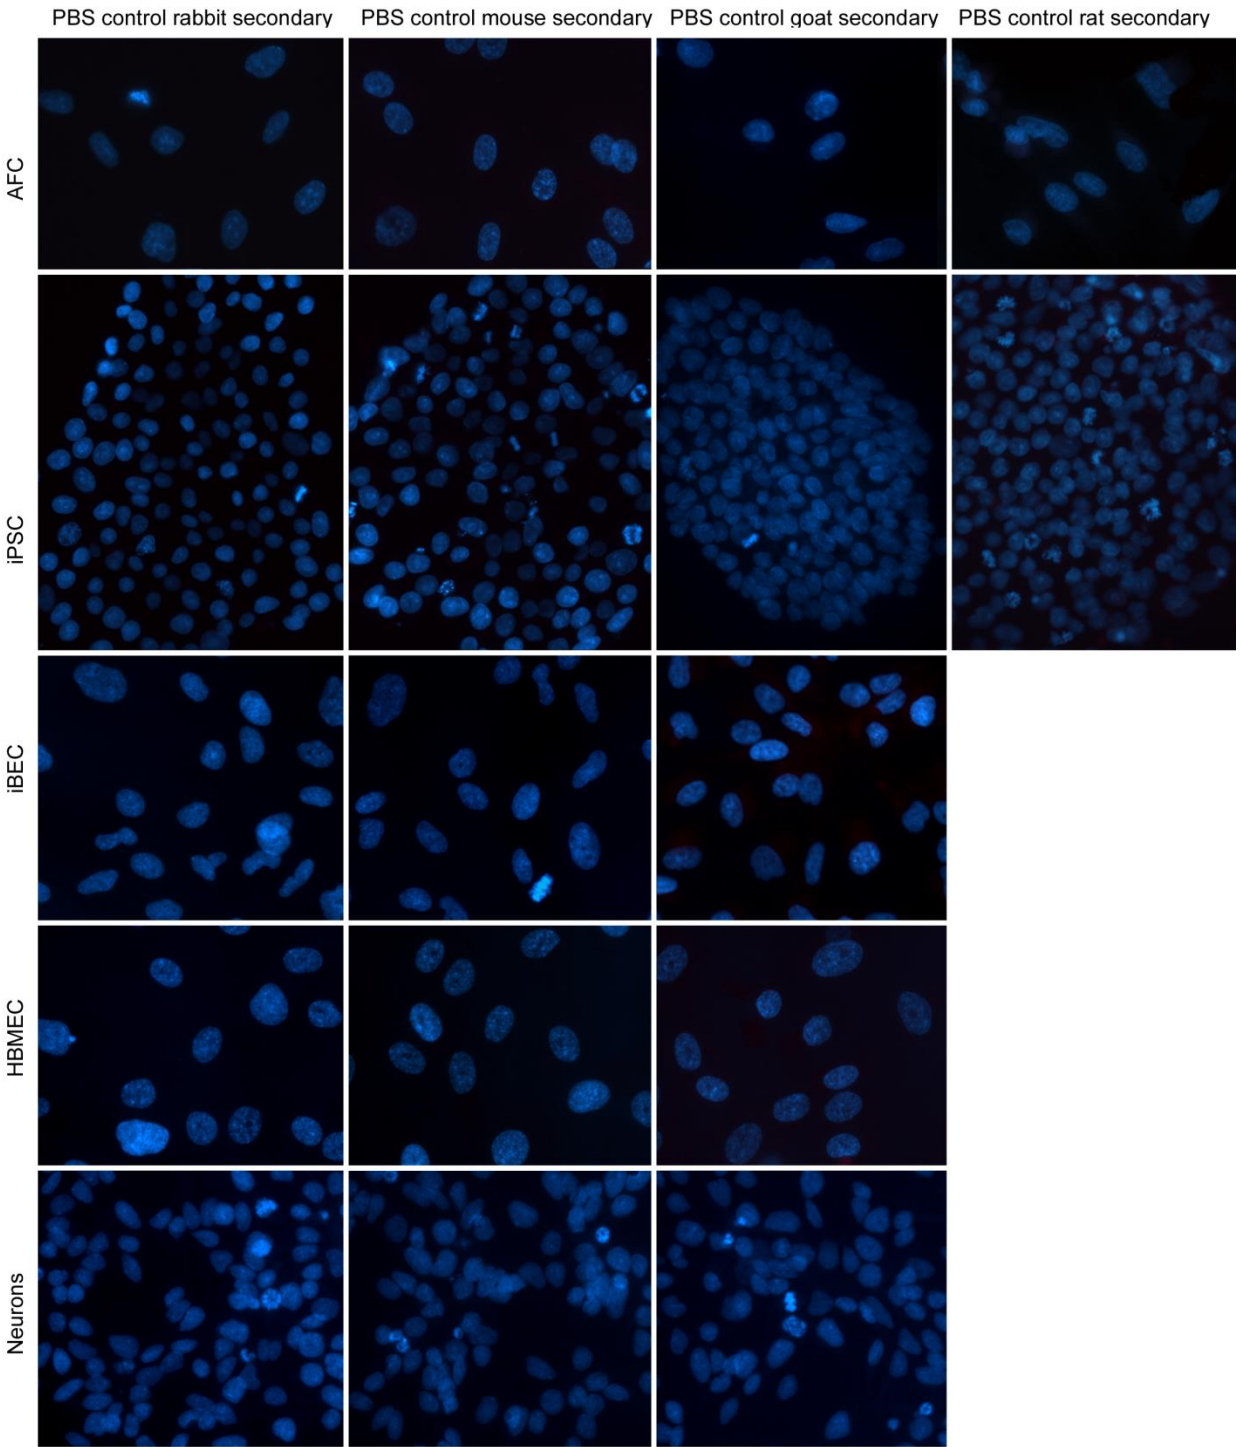

### Supplementary Figure 8. Negative controls for immunostaining.

PBS only secondary controls are presented, overlaid with Hoechst, for each cell line studied and secondary antibody used.

### Full length western blots (Figure 1 and Figure 2)

ACTIN (Figure 1)

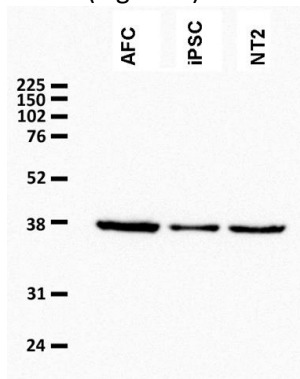

KLF4 (Figure 1)

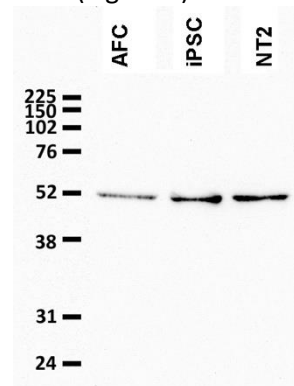

NANOG (Figure 1)

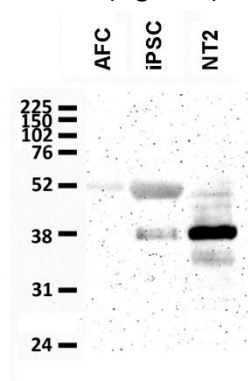

SOX2 (Figure 1)

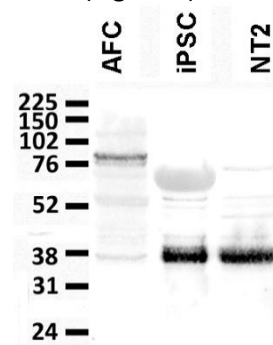

PAX6 (Figure 2)

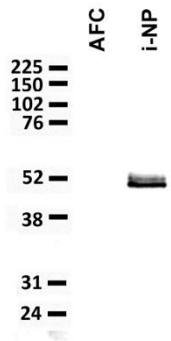

NESTIN (Figure 2)

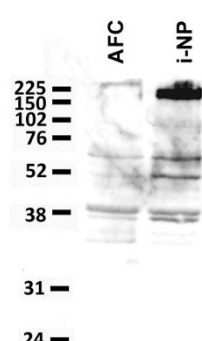

SOX2 (Figure 2)

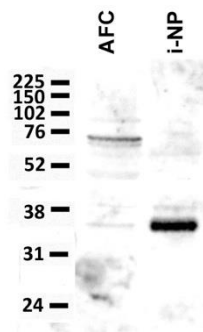

### Full length RT-PCR gels

Lane Annotation: **1:HBMEC, 2: iBEC, 3: NT2**



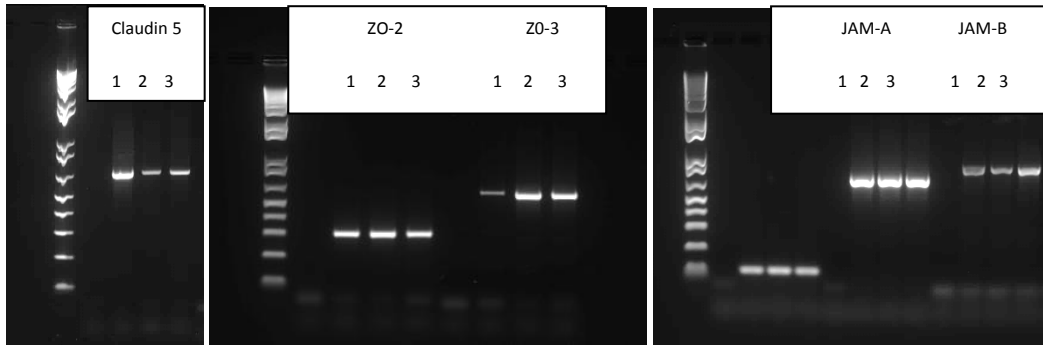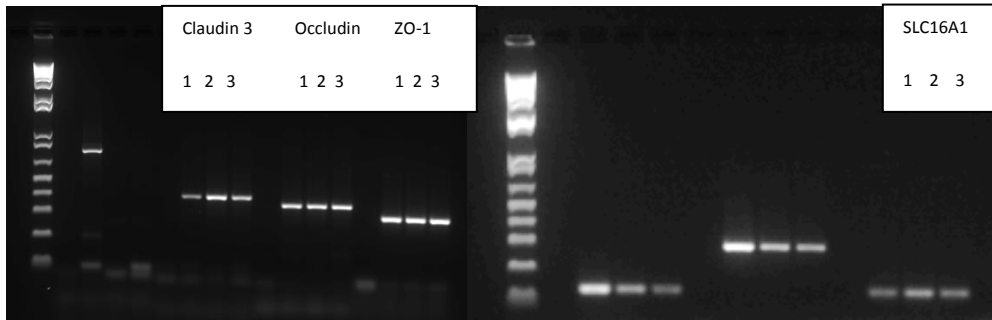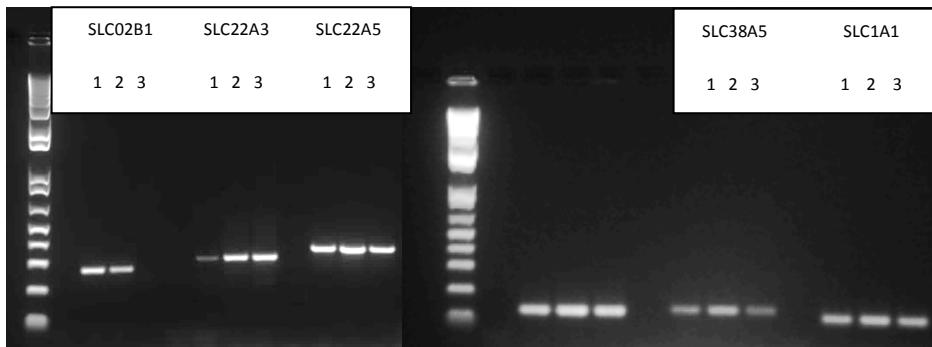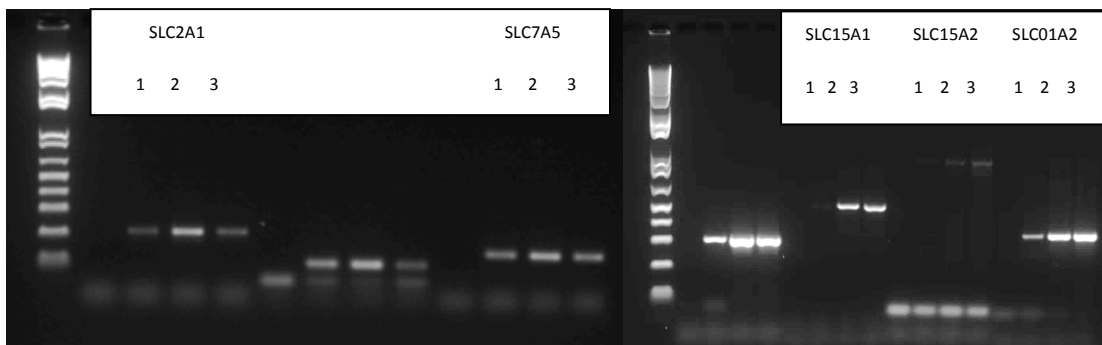

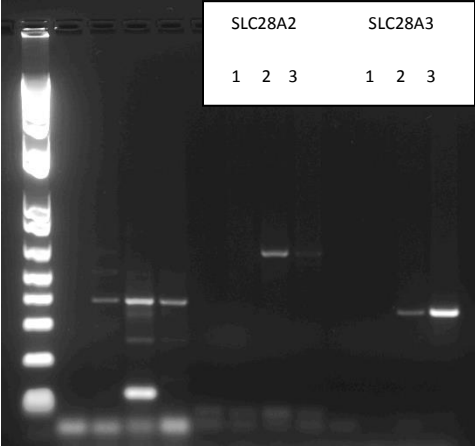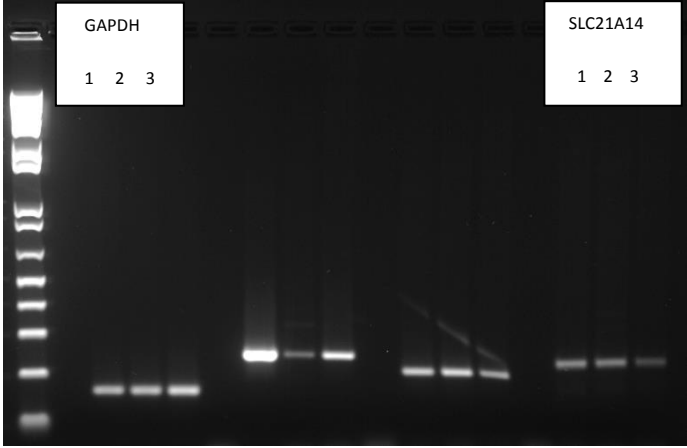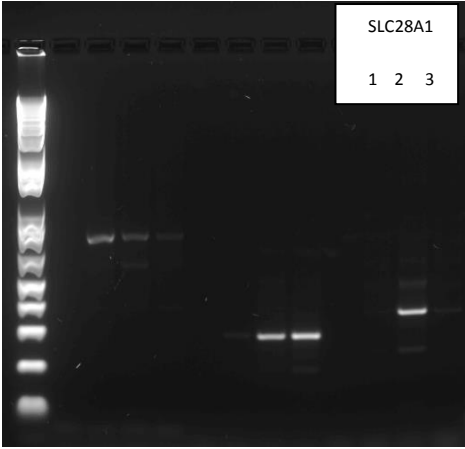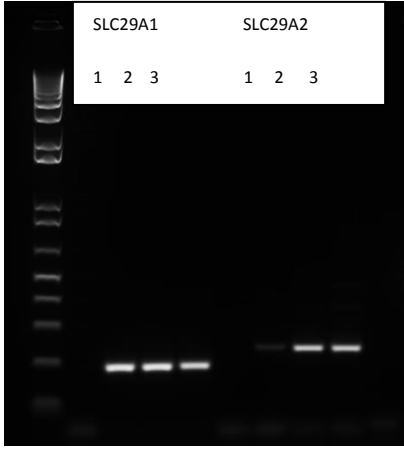

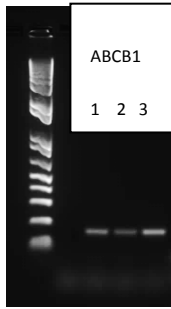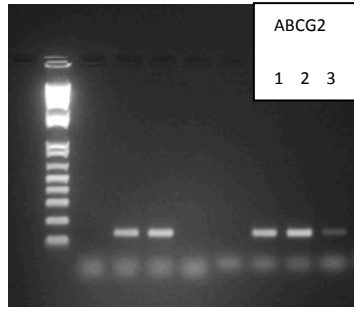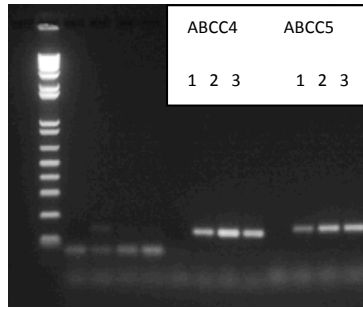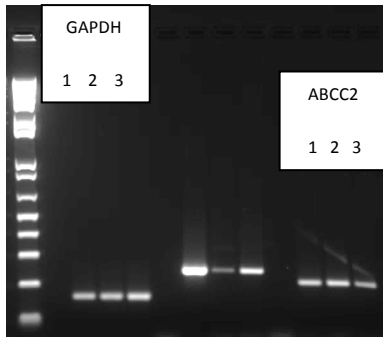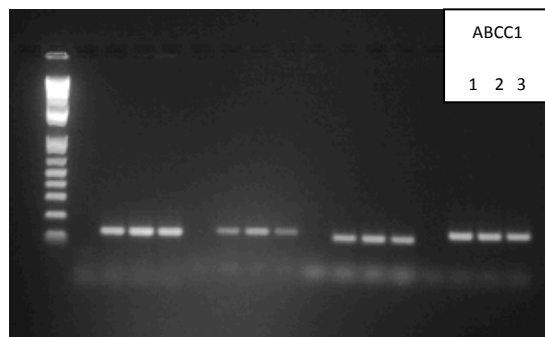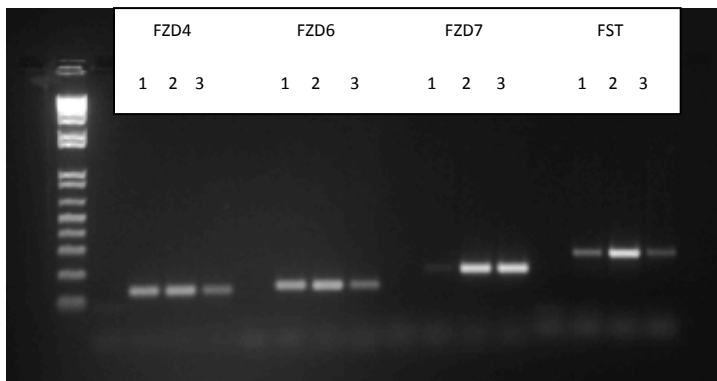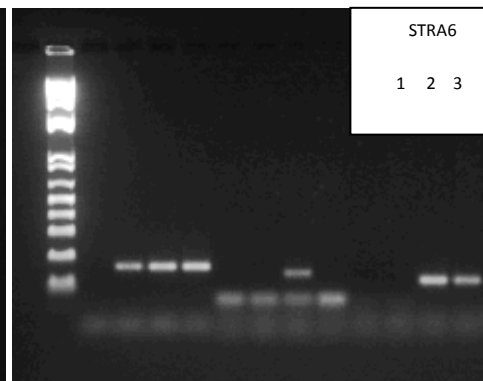

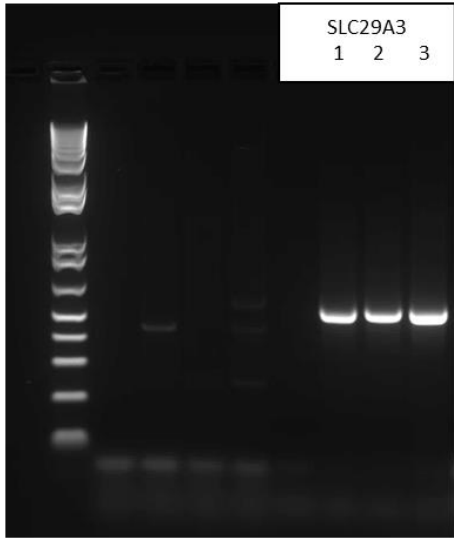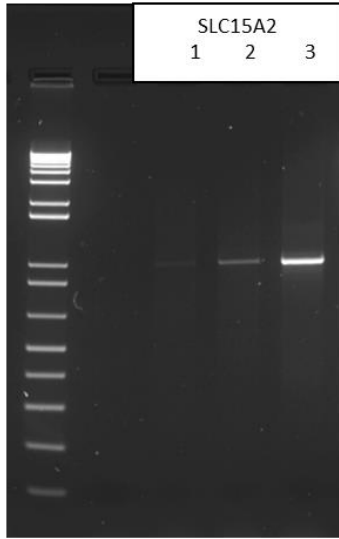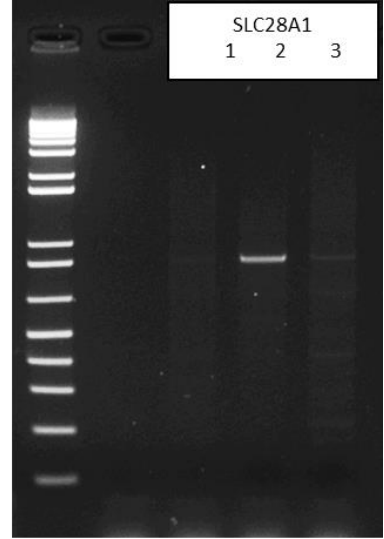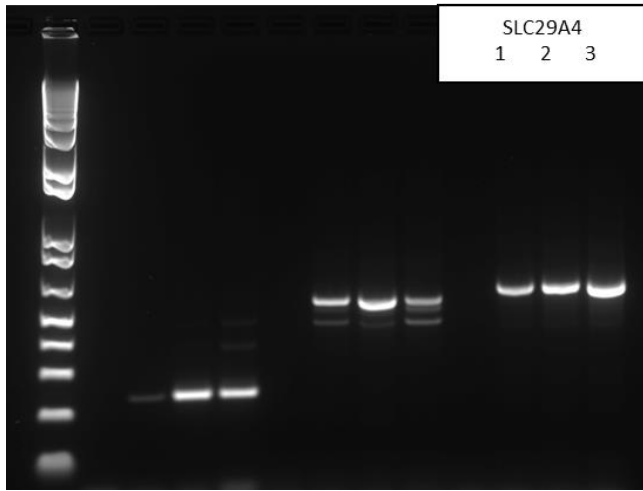

Supplement: 41598_2018_19522_MOESM1_ESM.pdf [file 41598_2018_19522_MOESM1_ESM.pdf]
